# Supplementary material for: Structural neural plasticity evoked by rapid-acting antidepressant interventions
Source: Springer Nature journal article supplement (doi:10.1038/s41583-024-00876-0), 2024-11-18
Supplement: 41583_2024_876_MOESM1_ESM.pdf [file 41583_2024_876_MOESM1_ESM.pdf]

**Supplementary information**

---

# Structural neural plasticity evoked by rapid-acting antidepressant interventions

---

**In the format provided by  
the authors and unedited**

**Title:** Structural neural plasticity evoked by rapid acting antidepressant interventions

**Authors:** Clara Liao<sup>1,2</sup>, Alisha Dua<sup>3</sup>, Cassandra Wojtasiewicz<sup>1</sup>, Conor Liston<sup>3,4</sup>, and Alex C. Kwan<sup>1,3,\*</sup>

**Supplementary Table 1: Experimental details of surveyed drug-evoked neuronal plasticity studies**

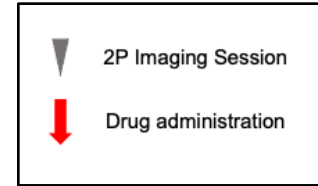

| Compound         | Author, year              | Mouse age   | Dose, treatment                                                                                                 | Mouse strain, brain region, putative cell type imaged                                                   |
|------------------|---------------------------|-------------|-----------------------------------------------------------------------------------------------------------------|---------------------------------------------------------------------------------------------------------|
| Allopregnanolone | Shi et al., 2022          | 4-5 months  | Daily dose of 10 mg/kg (s.c.) for 7 consecutive days                                                            | Thy1-GFPM, somatosensory cortex, layer V pyramidal neurons                                              |
|                  |                           |             |                                                                                                                 |                                                                                                         |
| Cocaine          | Muñoz-Cuevas et al., 2013 | 58-112 days | Daily dose of 15 mg/kg (i.p.) for 12 consecutive days                                                           | Thy1-YFPH, dorsomedial prefrontal cortex, layer V pyramidal neurons                                     |
|                  |                           |             |                                                                                                                 |                                                                                                         |
| Diazepam         | Shi et al., 2022          | 4-5 months  | Daily dose of 5 mg/kg (i.g.) for 7 or 28 consecutive days; Daily dose of 1 mg/kg (i.g.) for 8 consecutive weeks | Thy1-GFPM, somatosensory cortex or medial prefrontal cortex (via microprism), layer V pyramidal neurons |
|                  |                           |             |                                                                                                                 |                                                                                                         |

|                                       |                              |             |                                                                                                    |                                                                           |
|---------------------------------------|------------------------------|-------------|----------------------------------------------------------------------------------------------------|---------------------------------------------------------------------------|
| 2,5-dimethoxy-4-iodoamphetamine (DOI) | Cameron et al., 2021         | n/a         | 1 dose of 10 mg/kg (i.p.)                                                                          | Thy1-GFPM, primary sensory cortex, layer V pyramidal neurons              |
|                                       |                              |             |                                                                                                    |                                                                           |
| Fluoxetine                            | Shapovalov et al., 2014      | n/a         | 100 mg/L in drinking water for 4 weeks                                                             | Thy1-GFPM, visual cortex, layer V pyramidal neurons                       |
|                                       |                              |             |                                                                                                    |                                                                           |
| Haloperidol                           | Bowling et al., 2014         | 1 month     | 1 dose of 0.25 mg/kg (i.p.)                                                                        | Thy1-YFPH, frontal association cortex, layer V pyramidal neurons          |
|                                       |                              |             |                                                                                                    |                                                                           |
| Ketamine                              | Phoumthippavong et al., 2016 | 10-21 weeks | 1 dose of 10 mg/kg (i.p.)                                                                          | Thy1-GFPM and Thy1-YFPH, medial frontal cortex, layer V pyramidal neurons |
|                                       |                              |             |                                                                                                    |                                                                           |
| Ketamine                              | Ng et al., 2018              | 1 month     | Daily dose of 10 mg/kg (i.p.) for 1, 2, or 7 days at various schedule relative to restraint stress | Thy1-YFPH, frontal association cortex, layer V pyramidal neurons          |
|                                       |                              |             |                                                                                                    |                                                                           |

|                   |                          |            |                                                                                                                               |                                                                       |
|-------------------|--------------------------|------------|-------------------------------------------------------------------------------------------------------------------------------|-----------------------------------------------------------------------|
| Ketamine          | Pryazhnikov et al., 2018 | 4-10 weeks | Daily dose of 10 mg/kg (i.p.) for 5 consecutive days                                                                          | Thy1-YFPH, somatosensory cortex, layer V pyramidal neurons            |
|                   |                          |            |                                                                                                                               |                                                                       |
| Ketamine          | Moda-Sava et al., 2019   | 9-20 weeks | 1 dose of 10 mg/kg (i.p.)                                                                                                     | Thy1-YFPH, medial prefrontal cortex (via microprism), pyramidal cells |
|                   |                          |            |                                                                                                                               |                                                                       |
| Ketamine-xylozine | Yang et al., 2011        | 1 month    | 2.5 or 5 mL/kg (i.p.) of 17 mg/mL ketamine and 1.7 mg/mL xylozine, then 2.5 mL/kg (s.c.) every 1.5 hr after initial injection | Thy1-YFPH, primary somatosensory cortex, layer V pyramidal neurons    |
|                   |                          |            |                                                                                                                               |                                                                       |
| 5-MeO-DMT         | Jefferson et al., 2023   | 5-8 weeks  | 1 dose of 20 mg/kg (i.p.)                                                                                                     | Thy1-GFPM, medial frontal cortex, layer V pyramidal neurons           |
|                   |                          |            |                                                                                                                               |                                                                       |

|                                                  |                                |                |                                                                     |                                                              |
|--------------------------------------------------|--------------------------------|----------------|---------------------------------------------------------------------|--------------------------------------------------------------|
| Phosphodiesterase 9 (PDE9) Inhibitor PF-04449613 | Lai et al., 2018               | 4-5 weeks      | Twice daily dose of 3.2 or 10 mg/kg (s.c.) for 1, 7, or 28 days     | Thy1-YFPH, primary motor cortex, layer V pyramidal neurons   |
|                                                  |                                |                |                                                                     |                                                              |
| Psilocybin                                       | Shao et al., 2021              | 8-10 weeks     | 1 dose of 1 mg/kg (i.p.)                                            | Thy1-GFPM, medial frontal cortex, layer V pyramidal neurons  |
|                                                  |                                |                |                                                                     |                                                              |
| Tabernanthalog (TBG)                             | Cameron et al., 2021           | n/a            | 1 dose of 50 mg/kg (i.p.)                                           | Thy1-GFPM, primary sensory cortex, layer V pyramidal neurons |
|                                                  |                                |                |                                                                     |                                                              |
| Tabernanthalog (TBG)                             | Lu et al., 2021                | 2 months       | 1 dose of 10 mg/kg (i.p.)                                           | Thy1-GFPM, somatosensory cortex, layer V pyramidal neurons   |
|                                                  |                                |                |                                                                     |                                                              |
| $\Delta^9$ -tetrahydrocannabinol (THC)           | Komorowska-Müller et al., 2023 | 3 or 18 months | Daily dose of 3 mg/kg for 28 days via osmotic pump (during imaging) | Thy1-GFPM, somatosensory cortex, layer V pyramidal neurons   |
|                                                  |                                |                |                                                                     |                                                              |

|          |                                                                                                                                                                                                                                                                                                                                                                                                                                                                                                       |            |                                                             |                                                            |
|----------|-------------------------------------------------------------------------------------------------------------------------------------------------------------------------------------------------------------------------------------------------------------------------------------------------------------------------------------------------------------------------------------------------------------------------------------------------------------------------------------------------------|------------|-------------------------------------------------------------|------------------------------------------------------------|
| Zolpidem | Shi et al., 2022                                                                                                                                                                                                                                                                                                                                                                                                                                                                                      | 4-5 months | Twice daily dose of 2.5 mg/kg (i.g.) for 7 consecutive days | Thy1-GFPM, somatosensory cortex, layer V pyramidal neurons |
|          | <p>The diagram illustrates a timeline for Zolpidem administration. The x-axis is labeled 'Day' and has markers at -14, -7, 0, 7, 14, 21, 28, 35, and 63. A break in the timeline is indicated by two parallel slashes between Day 35 and Day 63. Red arrows pointing downwards are located at Day 0, 1, 2, 3, 4, 5, and 6, representing twice-daily dosing. Grey triangles pointing downwards are located at Day -14, -7, 7, 14, 21, 28, 35, and 63, representing sampling or measurement points.</p> |            |                                                             |                                                            |

Supplementary Data: Data extraction from published studies for Figure 2

**Ketamine (Phoumthipphavong, 2016)**

|         | Control Datapoints |                          |                     | Drug Treatment Datapoints |                          |                     | (Scaled Drug Y) - (Scaled Cntrl Y) |
|---------|--------------------|--------------------------|---------------------|---------------------------|--------------------------|---------------------|------------------------------------|
|         | Extracted Y value  | Diff from origin Y-coord | Scaled Y Coordinate | Extracted Y value         | Diff from origin Y-coord | Scaled Y Coordinate |                                    |
| day -3  | 101                | 0                        | 0                   | 107                       | -6                       | -0.991735537        | -0.991735537                       |
| day -1  | 150                | -49                      | -8.099173554        | 138                       | -37                      | -6.115702479        | 1.983471074                        |
| day +1  | 207                | -106                     | -17.52066116        | 106                       | -5                       | -0.826446281        | 16.69421488                        |
| day +3  | 212                | -111                     | -18.24710744        | 116                       | -15                      | -2.479338843        | 15.86776863                        |
| day +5  | 251                | -150                     | -24.79338843        | 137                       | -36                      | -5.950413223        | 18.84297521                        |
| day +10 | 263                | -162                     | -26.7768595         | 122                       | -21                      | -3.47107438         | 23.30578512                        |
| day +15 | 234                | -133                     | -21.98347107        | 153                       | -52                      | -8.595041322        | 13.38842975                        |

| Final Values Plotted on Fig 4b |           |
|--------------------------------|-----------|
| X                              | Y         |
| -3                             | -0.991736 |
| -1                             | 1.983471  |
| 1                              | 16.69421  |
| 3                              | 15.86777  |
| 5                              | 18.84298  |
| 10                             | 23.30579  |
| 15                             | 13.38843  |

| Extracted Reference Values for Scaling | Extracted Y value | Diff from origin Y-coord |
|----------------------------------------|-------------------|--------------------------|
| Y-min (-40)                            | 343               | -242                     |
| Y = 0                                  | 101               | 0                        |
| Y-max (10)                             | 40                | 61                       |

**5-MeO-DMT (Jefferson, 2023)**

|         | Control Datapoints |                          |                     | Drug Treatment Datapoints |                          |                     | (Scaled Drug Y) - (Scaled Cntrl Y) |
|---------|--------------------|--------------------------|---------------------|---------------------------|--------------------------|---------------------|------------------------------------|
|         | Extracted Y value  | Diff from origin Y-coord | Scaled Y Coordinate | Extracted Y value         | Diff from origin Y-coord | Scaled Y Coordinate |                                    |
| day -3  | 234                | 0                        | 0                   | 234                       | 0                        | 0                   | 0                                  |
| day -1  | 227                | 7                        | 1.60130719          | 242                       | -8                       | -1.820065359        | -3.431372549                       |
| day +1  | 218                | 16                       | 3.660130719         | 165                       | 69                       | 15.78431373         | 12.12418301                        |
| day +3  | 271                | -37                      | -8.464052288        | 179                       | 55                       | 12.58169935         | 21.04575163                        |
| day +5  | 261                | -27                      | -6.176470588        | 209                       | 25                       | 5.718954248         | 11.89542484                        |
| day +7  | 286                | -54                      | -12.35294118        | 199                       | 35                       | 8.006535948         | 20.35947712                        |
| day +34 | 294                | -60                      | -13.7254902         | 184                       | 50                       | 11.4379085          | 25.16339869                        |

| Final Values Plotted on Fig 4b |           |
|--------------------------------|-----------|
| X                              | Y         |
| -3                             | 0         |
| -1                             | -3.431373 |
| 1                              | 12.12418  |
| 3                              | 21.04575  |
| 5                              | 11.89542  |
| 7                              | 20.35948  |
| 34                             | 25.1634   |

| Extracted Reference Values for Scaling | Extracted Y value | Diff from origin Y-coord |
|----------------------------------------|-------------------|--------------------------|
| Y-min (-25)                            | 343               | -109                     |
| Y = 0                                  | 234               | 0                        |
| Y-max (35)                             | 81                | 153                      |

**Psilocybin (Shao, 2021)**

|         | Control Datapoints |                          |                     | Drug Treatment Datapoints |                          |                     | (Scaled Drug Y) - (Scaled Cntrl Y) |
|---------|--------------------|--------------------------|---------------------|---------------------------|--------------------------|---------------------|------------------------------------|
|         | Extracted Y value  | Diff from origin Y-coord | Scaled Y Coordinate | Extracted Y value         | Diff from origin Y-coord | Scaled Y Coordinate |                                    |
| day -3  | 134                | 0                        | 0                   | 134                       | 0                        | 0                   | 0                                  |
| day -1  | 139                | -5                       | -1.578947368        | 135                       | -11                      | -0.315789474        | 1.263157895                        |
| day +1  | 145                | -11                      | -3.473684211        | 112                       | 22                       | 6.947368421         | 10.42105263                        |
| day +3  | 144                | -10                      | -3.157894737        | 102                       | 32                       | 10.10526316         | 13.26315789                        |
| day +5  | 141                | -7                       | -2.210526316        | 100                       | 34                       | 10.73684211         | 12.94736842                        |
| day +7  | 140                | -6                       | -1.894736842        | 95                        | 39                       | 12.31578947         | 14.21052632                        |
| day +34 | 167                | -33                      | -10.42105263        | 113                       | 21                       | 6.631578947         | 17.05263158                        |

| Final Values Plotted on Fig 4b |          |
|--------------------------------|----------|
| X                              | Y        |
| -3                             | 0        |
| -1                             | 1.263158 |
| 1                              | 10.42105 |
| 3                              | 13.26316 |
| 5                              | 12.94737 |
| 7                              | 14.21053 |
| 34                             | 17.05263 |

| Extracted Reference Values for Scaling | Extracted Y value | Diff from origin Y-coord |
|----------------------------------------|-------------------|--------------------------|
| Y-min (-20)                            | 198               | -64                      |
| Y = 0                                  | 134               | 0                        |
| Y-max (30)                             | 39                | 95                       |

**Diazepam (Shi, 2022)**

|         | Control Datapoints |                          |                     | Drug Treatment Datapoints |                          |                     | (Scaled Drug Y) - (Scaled Cntrl Y) |
|---------|--------------------|--------------------------|---------------------|---------------------------|--------------------------|---------------------|------------------------------------|
|         | Extracted Y value  | Diff from origin Y-coord | Scaled Y Coordinate | Extracted Y value         | Diff from origin Y-coord | Scaled Y Coordinate |                                    |
| day +1  | 89                 | 0                        | 0                   | 78                        | -5                       | -1.19047619         | -1.19047619                        |
| day +8  | 90                 | -1                       | -0.223880597        | 72                        | 1                        | 0.238095238         | 0.461975835                        |
| day +15 | 87                 | 2                        | 0.447761194         | 70                        | 3                        | 0.714285714         | 0.26652452                         |
| day +22 | 79                 | 10                       | 2.23880597          | 128                       | -55                      | -13.0652381         | -15.33404407                       |
| day +29 | 90                 | -1                       | -0.223880597        | 123                       | -50                      | -11.9047619         | -11.68088131                       |
| day +36 | 88                 | 1                        | 0.223880597         | 119                       | -46                      | -10.95238095        | -11.17626155                       |
| day +43 | 77                 | 12                       | 2.686567164         | 109                       | -36                      | -8.571428571        | -11.25799574                       |
| day +50 | 83                 | 6                        | 1.343283582         | 105                       | -32                      | -7.619047619        | -8.962331201                       |
| day +78 | 79                 | 10                       | 2.23880597          | 79                        | -6                       | -1.428571429        | -3.667377399                       |

\*Since drug/vehicle administration began on day 15, the x-values were shifted to reflect day 1 as day -14... day 15 as day 0, etc.

| Final Values Plotted on Fig 4b |           |
|--------------------------------|-----------|
| X                              | Y         |
| 1 -> -14                       | -1.190476 |
| 8 -> -7                        | 0.461976  |
| 15 -> 0                        | 0.266525  |
| 22 -> 7                        | -15.33404 |
| 29 -> 14                       | -11.68089 |
| 36 -> 21                       | -11.17626 |
| 43 -> 28                       | -11.25799 |
| 50 -> 35                       | -8.962331 |
| 78 -> 63                       | -3.667377 |

| Extracted Reference Values for Scaling - Control | Extracted Y value | Diff from origin Y-coord |
|--------------------------------------------------|-------------------|--------------------------|
| Y-min (70)                                       | 223               | -134                     |
| Y = 100                                          | 89                | 0                        |
| Y-max (110)                                      | 44                | 45                       |

| Extracted Reference Values for Scaling - Drug | Extracted Y value | Diff from origin Y-coord |
|-----------------------------------------------|-------------------|--------------------------|
| Y-min (70)                                    | 199               | -126                     |
| Y = 100                                       | 73                | 0                        |
| Y-max (110)                                   | 31                | 42                       |

**Zolpidem (Shi, 2022)**

|         | Control Datapoints |                          |                     | Drug Treatment Datapoints |                          |                     | (Scaled Drug Y) - (Scaled Cntrl Y) |
|---------|--------------------|--------------------------|---------------------|---------------------------|--------------------------|---------------------|------------------------------------|
|         | Extracted Y value  | Diff from origin Y-coord | Scaled Y Coordinate | Extracted Y value         | Diff from origin Y-coord | Scaled Y Coordinate |                                    |
| day +1  | 89                 | 0                        | 0                   | 146                       | -13                      | -1.397849462        | -1.397849462                       |
| day +8  | 90                 | -1                       | -0.223880597        | 124                       | 9                        | 0.967741935         | 1.191622532                        |
| day +15 | 87                 | 2                        | 0.447761194         | 127                       | 6                        | 0.64516129          | 0.197400096                        |
| day +22 | 79                 | 10                       | 2.23880597          | 129                       | 4                        | 0.430107527         | -1.808698443                       |
| day +29 | 90                 | -1                       | -0.223880597        | 130                       | 3                        | 0.322580645         | 0.546461242                        |
| day +36 | 88                 | 1                        | 0.223880597         | 125                       | 8                        | 0.860215054         | 0.636334457                        |
| day +43 | 77                 | 12                       | 2.686567164         | 122                       | 11                       | 1.182795699         | -1.503771465                       |
| day +50 | 83                 | 6                        | 1.343283582         | 107                       | 26                       | 2.795698925         | 1.452415343                        |
| day +78 | 79                 | 10                       | 2.23880597          | 116                       | 15                       | 1.61293022          | -0.625902744                       |

\*Since drug/vehicle administration began on day 15, the x-values were shifted to reflect day 1 as day -14... day 15 as day 0, etc.

| Final Values Plotted on Fig 4b |           |
|--------------------------------|-----------|
| X                              | Y         |
| 1 -> -14                       | -1.397849 |
| 8 -> -7                        | 1.191623  |
| 15 -> 0                        | 0.1974    |
| 22 -> 7                        | -1.808698 |
| 29 -> 14                       | 0.546461  |
| 36 -> 21                       | 0.636334  |
| 43 -> 28                       | -1.503771 |
| 50 -> 35                       | 1.452415  |
| 78 -> 63                       | -0.625903 |

| Extracted Reference Values for Scaling - Control | Extracted Y value | Diff from origin Y-coord |
|--------------------------------------------------|-------------------|--------------------------|
| Y-min (70)                                       | 223               | -134                     |
| Y = 100                                          | 89                | 0                        |
| Y-max (110)                                      | 44                | 45                       |

| Extracted Reference Values for Scaling - Drug | Extracted Y value | Diff from origin Y-coord |
|-----------------------------------------------|-------------------|--------------------------|
| Y-min (70)                                    | 412               | -279                     |
| Y = 100                                       | 133               | 0                        |
| Y-max (110)                                   | 40                | 93                       |

**Allopregnenolone (Shi, 2022)**

|         | Control Datapoints |                          |                     | Drug Treatment Datapoints |                          |                     | (Scaled Drug Y) - (Scaled Cntrl Y) |
|---------|--------------------|--------------------------|---------------------|---------------------------|--------------------------|---------------------|------------------------------------|
|         | Extracted Y value  | Diff from origin Y-coord | Scaled Y Coordinate | Extracted Y value         | Diff from origin Y-coord | Scaled Y Coordinate |                                    |
| day +1  | 89                 | 0                        | 0                   | 256                       | 3                        | 0.280373832         | 0.280373832                        |
| day +8  | 90                 | -1                       | -0.223880597        | 255                       | 4                        | 0.373831776         | 0.597712373                        |
| day +15 | 87                 | 2                        | 0.447761194         | 265                       | -6                       | -0.560747664        | -1.008508859                       |
| day +22 | 79                 | 10                       | 2.23880597          | 196                       | 63                       | 5.887850467         | 3.649044497                        |
| day +29 | 90                 | -1                       | -0.223880597        | 198                       | 61                       | 5.700834579         | 5.924815176                        |
| day +36 | 88                 | 1                        | 0.223880597         | 222                       | 37                       | 3.457943925         | 3.234063328                        |
| day +43 | 77                 | 12                       | 2.686567164         | 228                       | 31                       | 2.897196262         | 0.210629098                        |
| day +50 | 83                 | 6                        | 1.343283582         | 261                       | -2                       | -0.186915888        | -1.53019947                        |

\*Since drug/vehicle administration began on day 15, the x-values were shifted to reflect day 1 as day -14... day 15 as day 0, etc.

| Final Values Plotted on Fig 4b |           |
|--------------------------------|-----------|
| X                              | Y         |
| 1 -> -14                       | 0.280374  |
| 8 -> -7                        | 0.597712  |
| 15 -> 0                        | -1.008509 |
| 22 -> 7                        | 3.649044  |
| 29 -> 14                       | 5.924815  |
| 36 -> 21                       | 3.234063  |
| 43 -> 28                       | 0.210629  |
| 50 -> 35                       | -1.530199 |

| Extracted Reference Values for Scaling - Control | Extracted Y value | Diff from origin Y-coord |
|--------------------------------------------------|-------------------|--------------------------|
| Y-min (70)                                       | 223               | -134                     |
| Y = 100                                          | 89                | 0                        |
| Y-max (110)                                      | 44                | 45                       |

| Extracted Reference Values for Scaling - Drug | Extracted Y value | Diff from origin Y-coord |
|-----------------------------------------------|-------------------|--------------------------|
| Y-min (80)                                    | 473               | -214                     |
| Y = 100                                       | 259               | 0                        |
| Y-max (120)                                   | 45                | 214                      |

**Cocaine (Munoz-Cuevas, 2013)**

|         | Control Datapoints |                          |                     | Drug Treatment Datapoints |                          |                     | (Scaled Drug Y) - (Scaled Cntrl Y) |
|---------|--------------------|--------------------------|---------------------|---------------------------|--------------------------|---------------------|------------------------------------|
|         | Extracted Y value  | Diff from origin Y-coord | Scaled Y Coordinate | Extracted Y value         | Diff from origin Y-coord | Scaled Y Coordinate |                                    |
| day -1  | 121                | 0                        | 0                   | 121                       | 0                        | 0                   | 0                                  |
| day +1  | 136                | -15                      | -2.419354839        | 113                       | 8                        | 1.290322581         | 3.709677419                        |
| day +3  | 141                | -20                      | -3.225806452        | 108                       | 13                       | 2.096774194         | 5.322580645                        |
| day +5  | 151                | -30                      | -4.838709677        | 116                       | 5                        | 0.806451613         | 5.64516129                         |
| day +7  | 171                | -50                      | -8.064516129        | 115                       | 6                        | 0.967741935         | 9.032258065                        |
| day +9  | 156                | -35                      | -5.645161293        | 130                       | -9                       | -1.451612903        | 4.193548387                        |
| day +11 | 160                | -39                      | -6.290322581        | 132                       | -11                      | -1.774193548        | 4.516129032                        |
| day +13 | 158                | -37                      | -5.967741935        | 120                       | 1                        | 0.161290323         | 6.129032258                        |
| day +15 | 159                | -38                      | -6.129032258        | 134                       | -13                      | -2.096774194        | 4.032258065                        |
| day +17 | 187                | -66                      | -10.64516129        | 130                       | -9                       | -1.451612903        | 9.193548387                        |
| day +19 | 183                | -62                      | -10                 | 127                       | -6                       | -0.967741935        | 9.032258065                        |
| day +21 | 190                | -69                      | -11.12903226        | 135                       | -14                      | -2.258064516        | 8.870967742                        |
| day +23 | 182                | -61                      | -9.838709677        | 151                       | -30                      | -4.838709677        | 5                                  |
| day +25 | 194                | -73                      | -11.77419355        | 147                       | -26                      | -4.193548387        | 7.580645161                        |

| Final Values Plotted on Fig 4b |          |
|--------------------------------|----------|
| X                              | Y        |
| -1                             | 0        |
| 1                              | 3.709677 |
| 3                              | 5.322581 |
| 5                              | 5.645161 |
| 7                              | 9.032258 |
| 9                              | 4.193548 |
| 11                             | 4.516129 |
| 13                             | 6.129032 |
| 15                             | 4.032258 |
| 17                             | 9.193548 |
| 19                             | 9.032258 |
| 21                             | 8.870968 |
| 23                             | 5        |
| 25                             | 7.580645 |

| Extracted Reference Values for Scaling | Extracted Y value | Diff from origin Y-coord |
|----------------------------------------|-------------------|--------------------------|
| Y-min (-20)                            | 244               | -123                     |
| Y = 0                                  | 121               | 0                        |
| Y-max (15)                             | 28                | 93                       |



## References

1. Shi, Y., et al. Long-term diazepam treatment enhances microglial spine engulfment and impairs cognitive performance via the mitochondrial 18 kDa translocator protein (TSPO). *Nat Neurosci*, **25**, 317-329 (2022)
2. Munoz-Cuevas, F. J., Athilingam, J., Piscopo, D. & Wilbrecht, L. Cocaine-induced structural plasticity in frontal cortex correlates with conditioned place preference. *Nat Neurosci* **16**, 1367-1369 (2013).
3. Cameron, L. P. et al. A non-hallucinogenic psychedelic analogue with therapeutic potential. *Nature* **589**, 474-479 (2021).
4. Shapovalov, Y. et al. Fluoxetine modulates breast cancer metastasis to the brain in a murine model. *BMC Cancer* **14**, 598 (2014).
5. Bowling, H. et al. Antipsychotics activate mTORC1-dependent translation to enhance neuronal morphological complexity. *Sci Signal* **7**, ra4 (2014).
6. Phoumthippavong, V., Barthas, F., Hassett, S. & Kwan, A. C. Longitudinal Effects of Ketamine on Dendritic Architecture In Vivo in the Mouse Medial Frontal Cortex. *eNeuro* **3**, ENEURO.0133-0115.2016 (2016).
7. Ng, L. H. L. et al. Ketamine and selective activation of parvalbumin interneurons inhibit stress-induced dendritic spine elimination. *Transl Psychiatry* **8**, 272 (2018).
8. Pryazhnikov, E. et al. Longitudinal two-photon imaging in somatosensory cortex of behaving mice reveals dendritic spine formation enhancement by subchronic administration of low-dose ketamine. *Sci Rep* **8**, 6464 (2018).
9. Moda-Sava, R. N. et al. Sustained rescue of prefrontal circuit dysfunction by antidepressant-induced spine formation. *Science* **364**, eaat8078 (2019).
10. Yang, G., Chang, P. C., Bekker, A., Blanck, T. J. & Gan, W. B. Transient effects of anesthetics on dendritic spines and filopodia in the living mouse cortex. *Anesthesiology* **115**, 718-726 (2011).
11. Jefferson, S. J. et al. 5-MeO-DMT modifies innate behaviors and promotes structural neural plasticity in mice. *Neuropsychopharmacology* **48**, 1257-1266 (2023).
12. Lai, B., Li, M., Hu, W., Li, W. & Gan, W. B. The Phosphodiesterase 9 Inhibitor PF-04449613 Promotes Dendritic Spine Formation and Performance Improvement after Motor Learning. *Dev Neurobiol* **78**, 859-872 (2018).
13. Shao, L. X. et al. Psilocybin induces rapid and persistent growth of dendritic spines in frontal cortex in vivo. *Neuron* **109**, 2535-2544 e2534 (2021).
14. Lu, J. et al. An analog of psychedelics restores functional neural circuits disrupted by unpredictable stress. *Mol Psychiatry* **26**, 6237-6252 (2021).
15. Komorowska-Muller, J. A. et al. Chronic low-dose Delta(9)-tetrahydrocannabinol (THC) treatment stabilizes dendritic spines in 18-month-old mice. *Sci Rep* **13**, 1390 (2023).
